# Changes in non-oscillatory features of the cortical sensorimotor rhythm in Parkinson's disease across age

## Authors

Mikkel C. Vinding\* 1), Allison Eriksson 1)2), Cassia Man Ting Low 1)3), Josefine Waldthaler 4)5), Daniel Ferreira 6,7), Martin Ingvar 1), Per Svenningsson 4), Daniel Lundqvist 1).

## Affiliations

1. NatMEG, Department of Clinical Neuroscience, Karolinska Institutet, Sweden.
2. Department of Women's and Children's Health, Uppsala University, Sweden.
3. Cognitive Neuroimaging Centre, Lee Kong Chien School of Medicine, Nanyang Technological University, Singapore.
4. Section of Neurology, Department of Clinical Neuroscience, Karolinska Institutet, Sweden.
5. Department of Neurology, University Hospital Marburg, Marburg, Germany.
6. Division of Clinical Geriatrics, Center for Alzheimer's Research, Department of Neurobiology, Care Sciences, and Society, Karolinska Institutet, Stockholm, Sweden.
7. Department of Radiology, Mayo Clinic, Rochester, MN, USA.

## Corresponding author

Mikkel C. Vinding

Department of Clinical Neuroscience

Karolinska Institutet

Nobels väg 9, D2

171 77 Stockholm

Sweden

Email: [mikkel.vinding@ki.se](mailto:mikkel.vinding@ki.se)

## 1 Abstract

2 Parkinson's disease (PD) is associated with changes in neural activity in the sensorimotor alpha and  
3 beta bands. Using magnetoencephalography (MEG), we investigated the role of spontaneous neuronal  
4 activity within the somatosensory cortex in a large cohort of early- to mid-stage PD patients (N = 78)  
5 and age- and sex matched healthy controls (N = 60) using source reconstructed resting-state MEG. We  
6 quantified features of the time series data in terms of oscillatory alpha power, beta power, and 1/f  
7 broadband characteristics using power spectral density, and also characterised transient beta burst  
8 events in the time-domain signals. We examined the relationship between these signal features and the  
9 patients' disease state, symptom severity, age, sex, and cortical thickness.

10 PD patients and healthy controls differed on PSD broadband characteristics, with PD patients showing  
11 a steeper 1/f exponential slope and higher 1/f offset. PD patients further showed a steeper age-related  
12 decrease in the burst rate. Out of all the signal features of the sensorimotor activity, only burst rate was  
13 associated with increased severity of bradykinesia. Our study shows that general non-oscillatory  
14 features (broadband PSD slope and offset) of the sensorimotor signals are related to disease state and  
15 *oscillatory burst rate* scales with symptom severity in PD.

## 16 1 Introduction

17 Parkinson's disease (PD) is a common neurodegenerative disease characterised by a gradual  
18 accumulation of Lewy bodies and death of dopaminergic neurons.<sup>1,2</sup> The Lewy body pathology of PD  
19 begins long before the manifestation of motor symptoms. Accumulation of Lewy bodies is initially  
20 found in the olfactory bulb and brain stem and then spreads to the substantia nigra pars compacta,  
21 followed by several brain regions, including the basal ganglia and the neocortex.<sup>3</sup> The progressive  
22 structural and neurochemical changes in PD are accompanied by widespread functional changes in  
23 neuronal activity, which in turn lead to worsening clinical signs and symptoms such as tremor, rigidity,  
24 and bradykinesia and co-occurring non-motor symptoms like sleep disorders, depression, fatigue, and  
25 cognitive deficits.<sup>1</sup>

26 The changes in brain function in PD are particularly prominent in the oscillatory activity of neurons.<sup>4</sup>  
27 In PD, spontaneous oscillatory beta band (13–30 Hz) activity in the sub-thalamic nucleus (STN)  
28 exhibits a systematic disease-related increase in synchronicity that is related to the dopamine level<sup>5–8</sup>,  
29 and correlates with the severity of bradykinesia and rigidity symptoms.<sup>9,10</sup> Changes in the beta band  
30 extend beyond the STN through the basal ganglia-thalamic cortical sensorimotor network. The cortical  
31 manifestation of the disease-related changes in the sensorimotor network can be measured non-  
32 invasively from the cortex, using electro- or magnetoencephalography (EEG/MEG). Such non-invasive  
33 neural recordings can potentially provide easily available prospective biomarkers of disease or  
34 symptom-related neural changes in PD. Increased oscillatory beta-band activity in the sensorimotor  
35 cortex has been linked to increased symptom severity, such as rigidity and bradykinesia.<sup>11,12</sup> The role of  
36 dopamine on the cortical beta band is, however, still unclear. There is no consensus on how  
37 dopaminergic medication affects cortical beta-band power, with some studies reporting no effects<sup>11,13–</sup>

38 <sup>15</sup> and others an increase in beta-band power.<sup>16-18</sup> Deep brain stimulation of the STN in PD patients has  
39 been shown to lead to a decrease in the power of spontaneous activity in the cortical sensorimotor beta  
40 and alpha (8-12Hz) bands<sup>19,20</sup> (but see also<sup>16,21</sup>).

41 Importantly, there is evidence that the beta-band changes are not in the same direction across the  
42 different stages of PD. For example, there are reports of increased cortical beta-band power in the early  
43 stages of PD<sup>22</sup>, whereas the later stages are associated with decreased beta-band power.<sup>23</sup> Further, the  
44 beta-band power is not the *only* feature of the sensorimotor rhythms that is altered in PD. Several  
45 studies have found a shift in the beta-band centre frequency (the frequency at which the power  
46 spectrum density peaks in the beta-band) towards a lower frequency in PD patients compared to  
47 healthy controls.<sup>24-26</sup> The shift towards lower beta-band centre frequency is more pronounced in PD  
48 patients with dementia<sup>27-30</sup> and correlates with reduced cognitive ability.<sup>26,31</sup> Notably, the centre  
49 frequency shift is detectable already in the early stages of PD<sup>25</sup> and does not seem to be affected by  
50 dopaminergic medication.<sup>32</sup> The changes in beta-band power and centre frequency in PD could indicate  
51 that different features of the oscillatory beta-band activity reflect different underlying neural functions  
52 expressed in the measured sensorimotor signals. Changes in beta-band power could be functionally  
53 related to sensorimotor disturbances, and changes in centre frequency could be related to cognitive  
54 function.

55 The characteristics of neuronal oscillatory activity may hold additional information of disease-related  
56 changes in PD.<sup>33</sup> Both beta-band power and centre frequency reflect a quantification of power spectral  
57 density (PSD). While these features can provide valuable information about disease-related changes in  
58 PD, the PSD quantification of a neural time series provides a static summary of the oscillatory activity  
59 across the entire time series. PSD does not account for inherent dynamics in this activity or changes in

60 the time series on shorter time scales—as is prevalent in neural time series. The beta-band exhibits a  
61 great degree of variation over time and contains characteristic high-amplitude "bursts" that last about  
62 50-200 ms, both in the cortical and sub-cortical beta-bands.<sup>34–37</sup> Functionally, the transient bursts  
63 appear to play a pivotal role in sensorimotor processing through the basal ganglia-thalamic-cortical  
64 network. For instance, the presence of a beta burst in the sensorimotor cortex close to a tactile  
65 stimulation decreased the likelihood of tactile detection<sup>38</sup>, and the rate of beta bursts is shown to  
66 decrease in the time leading up to a movement both in STN<sup>39–41</sup> and in the sensorimotor cortex.<sup>42,43</sup>

67 In PD, quantification of beta-band burst activity from recordings in the STN has shown that beta-burst  
68 rate and duration are reduced by dopaminergic medication<sup>44,45</sup> and deep brain stimulation.<sup>37</sup>

69 Furthermore, PD patients exhibit a decrease in the rate of beta burst at the cortical level compared to  
70 healthy controls.<sup>14</sup> This decrease in beta burst rate is inversely related with increased severity of motor  
71 symptoms;<sup>46</sup> particularly bradykinesia and postural-kinetic tremor symptoms, but there is not evidence  
72 pointing to an effect of dopaminergic medication on cortical bursting properties.<sup>14</sup> Notably, the burst  
73 rate showed a higher sensitivity than PSD beta power for discriminating PD patients from healthy  
74 controls, demonstrating that the choice of method for analysing beta-band features influences the  
75 sensitivity of subsequent analyses. This is further complicated by the fact that in addition to disease-  
76 related changes, these features likely differ with age,<sup>43,47</sup> and the fact that most studies on oscillatory  
77 changes in PD come from studies with small sizes.<sup>48</sup> The central challenge is quantifying the measured  
78 neural signals to extract the disease's relevant features from the signals, be it the spectral power, centre  
79 frequencies, or burst-like features.

80 In the current study, we aimed to compare how different oscillatory features of cortical sensorimotor  
81 activity change in PD to elucidate what oscillatory features in the neural time-series differ between PD

82 patients and healthy controls and how these features are associated with different motor symptoms in  
83 PD. We extracted the sensorimotor neural resting-state activity from source reconstructed resting-state  
84 MEG signals in the sensorimotor cortex (Figure 1) and quantified the time-series in terms of the PSD in  
85 the canonical mu-band (8-30 Hz).<sup>49,50</sup> In addition to the band-specific analysis, we compared the 1/f  
86 broadband characteristics of the PSD.<sup>51,52</sup> Finally, we compared features of the sensorimotor rhythm in  
87 terms of time-domain analysis of spontaneous transient bursts.<sup>14,38</sup> We tested the hypotheses of altered  
88 functional changes in PD by analysing how these features differed between PD patients and healthy  
89 controls and further investigated the interactions with age and sex. As ageing is associated with  
90 structural and functional changes in the sensorimotor cortex<sup>53,54</sup>, we investigated if the potential  
91 changes in sensorimotor activity in PD differed across age. Since both healthy ageing and PD disease  
92 progression are linked to thinning of the cortex<sup>55,56</sup>, we further included thickness of the sensorimotor  
93 cortex in the analysis as a potential mediating factor on the sensorimotor activity that potentially also  
94 interacts with disease state.

95 The central hypothesis was that there would be differences between healthy controls and PD in features  
96 of the sensorimotor signals, but also that different features may be related to different functional  
97 changes. We hypothesised that individual oscillatory features would reflect different underlying neural  
98 functions in the sensorimotor system and thereby show different relationships to the clinical  
99 manifestations of specific motor symptoms in PD. We tested this hypothesis in two steps: first,  
100 examining the inter-relationship between all different measures, and subsequently, examining what  
101 feature—or combination of features—best explained the variation in severity within each motor  
102 symptom.

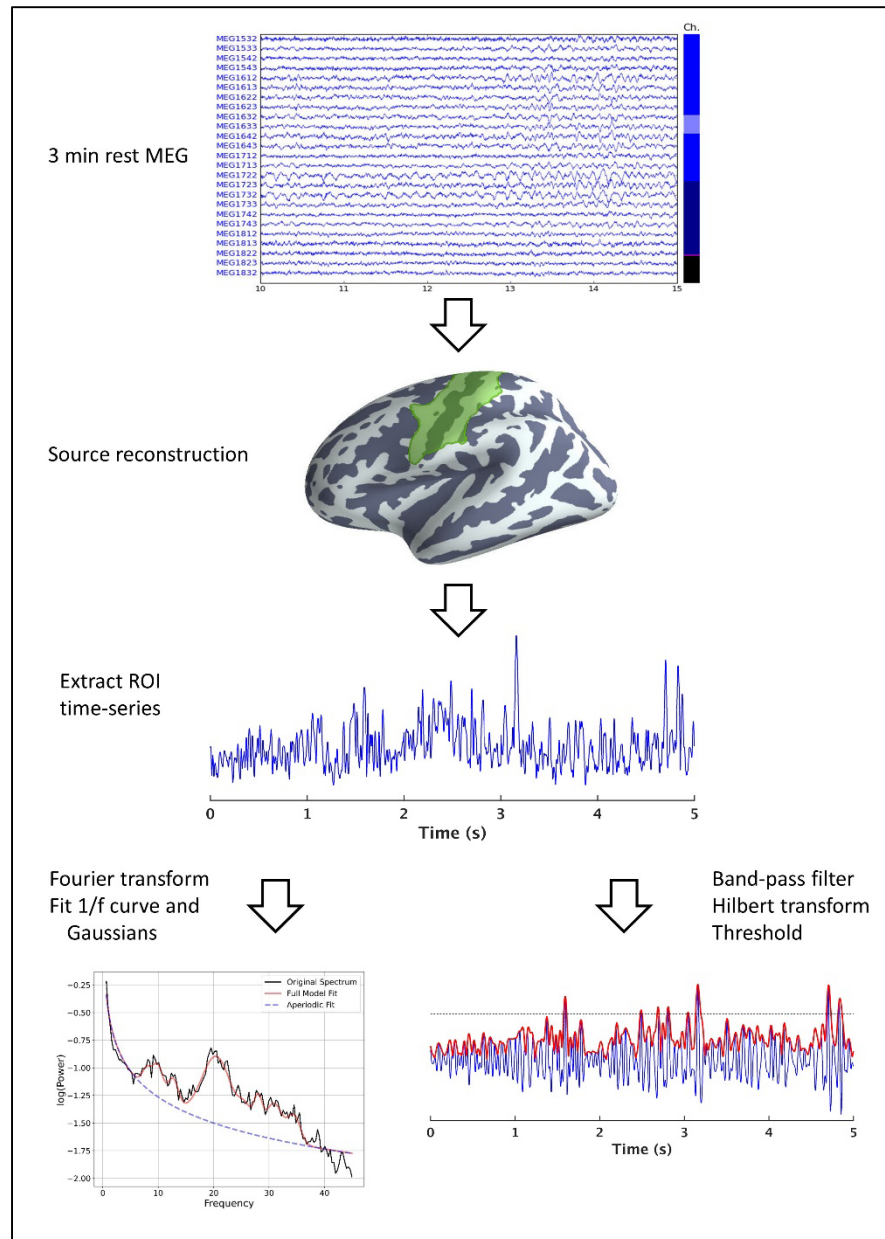

103

104 **Figure 1: Overview of the data processing pipeline.** Three minutes raw resting-state MEG data was  
105 obtained from each participant. The signals were projected through a minimum-norm source  
106 reconstruction to extract the activity in the sensorimotor cortex. We did a frequency decomposition of  
107 the source reconstructed signal to calculate the PSD to which a 1/f and Gaussian curve were fitted to  
108 extract the PSD features (Table 2). In addition, we quantified sensorimotor bursts in the signal time



109 series in the sensorimotor ROI by thresholding the envelope of the band-pass filtered (8-30 Hz) signal  
110 to the mu-beta frequency range.

## 111 2 Results

112 To enable a sensitive assessment of disease-related oscillatory changes in PD, we aimed for a relatively  
113 large cohort compared to other functional neuroimaging studies of PD patients (N=78) and healthy  
114 controls (N=60), balanced across gender and age, and with gender- and age-matched groups (Table 1).

115 Table 1: Group-level summary of the participants included in the analysis. Mean (standard deviation).

| Measure                  | Parkinson's patients | Healthy controls | Statistics                        |
|--------------------------|----------------------|------------------|-----------------------------------|
| <i>N</i>                 | 78                   | 60               |                                   |
| <i>Sex (female/male)</i> | 29/49                | 27/33            | $\chi^2 = 0.57, p = 0.45$         |
| <i>Age</i>               | 65.6 (9.5)           | 63.93 (8.4)      | Welsh $t(138.0) = 1.08, p = 0.28$ |
| <i>Disease duration</i>  | 4.4 (3.7) years      | -                | -                                 |
| <i>LEDD</i>              | 548 (273) mg         | -                | -                                 |
| <i>MDS-UPDRS-III</i>     | 18.9 (10.8)          | -                | -                                 |
| <i>MoCA</i>              | 26.1 (2.8)           | 26.2 (2.1)       | Welsh $t(136) = 0.10, p = 0.92$   |

116

117 Table 2: Summary explanations of the main outcome variables in the analysis

| Variable category | Variable          | Explanation                                                                                                                                      |
|-------------------|-------------------|--------------------------------------------------------------------------------------------------------------------------------------------------|
| <b>PSD</b>        | <i>Beta power</i> | The maximum peak in the 13-30 Hz band. Estimated as the height of the Gaussian function fitted to the PSD after regressing out the 1/f spectrum. |

|              |                                    |                                                                                                                                                                                  |
|--------------|------------------------------------|----------------------------------------------------------------------------------------------------------------------------------------------------------------------------------|
|              | <i>Beta centre frequency (Hz)</i>  | The dominant frequency bin in the 13-30 Hz band. Estimated as the centre of the Gaussian function fitted to the 13-30 Hz range of the PSD after regressing out the 1/f spectrum. |
|              | <i>Alpha power</i>                 | The maximum peak in the 8-12 Hz band. Estimated as the height of the Gaussian function fitted to the PSD after regressing out the 1/f spectrum.                                  |
|              | <i>Alpha centre frequency (Hz)</i> | The dominant frequency bin in the 8-12 Hz band. Estimated as the centre of the Gaussian function fitted to the 8-12 Hz range of the PSD after regressing out the 1/f spectrum.   |
|              | <i>1/f offset</i>                  | The intercept of the log-linear regression line estimated from the full PSD in the 0.5-40 Hz range.                                                                              |
|              | <i>1/f exponent</i>                | The decay exponent ( $1/f^k$ ) of the PSD, corresponding to the slope of the log-linear regression line, estimated from the full PSD in the 0.5-40 Hz range.                     |
| <b>Burst</b> | <i>Rate</i>                        | The number of burst events in the time series divided by the length of the time series                                                                                           |
|              | <i>Duration (ms)</i>               | The time point from where the signal envelope rise above the threshold until the next time point it drops below the threshold.                                                   |
|              | <i>Interval (ms)</i>               | The time point from where the signal envelope drops below the threshold until the next time point it rises above the threshold.                                                  |
|              | <i>Amplitude</i>                   | The maximum envelope amplitude within a burst event.                                                                                                                             |

118

119 For the first analysis, we investigated how features in the resting-state activity from the sensorimotor  
120 area quantified by features of the PSD and burst characteristics (see Table 2) differed as a function of  
121 the predictors *group* (PD patients/healthy controls; Table 1), *age*, *sex*, and *cortical thickness* as well as  
122 the interaction between the predictors.

## 123 2.1 PSD features

124 The PSD suggests an apparent group difference between PD patients and healthy controls in the alpha  
125 and beta bands (Figure 2). However, analysing the oscillatory components of PSD by first adjusting for

126 the broadband characteristic of the PSD<sup>51</sup> removed the apparent group difference in the mu- and beta  
127 band. Bayesian model comparison was used to test which predictors explained the variation in the PSD  
128 (Bayes Factors (BF) > 3 taken as cutoff for substantial evidence for an effect of a given predictor<sup>57</sup>).  
129 The model comparison showed evidence for group differences on the 1/f offset (BF = 37.77) and 1/f  
130 exponent (BF = 5.92). There were no substantial evidence of an effect beyond the threshold for  
131 substantial evidence on any other PSD features. However, it might be worth noting that there was  
132 anecdotal evidence of an effect of cortical thickness on 1/f exponent (BF = 1.73), an interaction effect  
133 between age and group on alpha centre frequency (BF = 1.43), and only minute evidence for a group  
134 difference on beta power (BF = 1.28). The coefficients of regression models analysing the effect of the  
135 predictors on PSD for all outcome measures are presented in Figure 3.

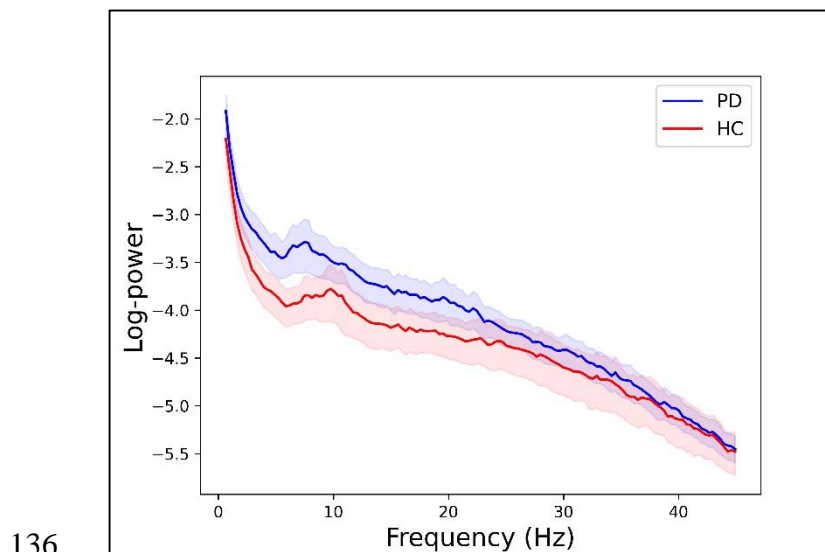

137 **Figure 2: Group-level PSD.** Grand average PSD (mean+standard error) for the PD group (blue) and  
138 healthy control group (red).

139 Analysing the PSD by regressing out the 1/f contribution to the spectrum, the difference between PD  
140 patients and healthy controls is not so much in the canonical beta- and alpha bands but manifests in the

141 broadband characteristics of the signal. The 1/f intercept was 23.5% [CI: 11.8:33.7%] higher for PD  
 142 patients than healthy controls, and PD patients had on average 11.9% [CI: -30.4:3.8%] steeper 1/f  
 143 exponential slope compared to healthy controls.

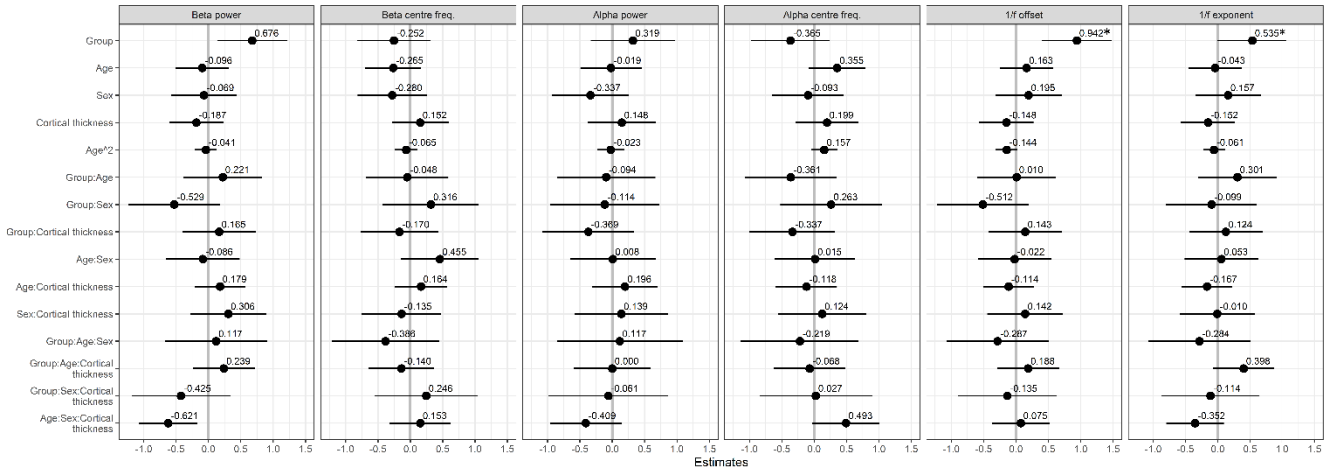

144

145 **Figure 3: Regression analysis of PSD features.** Standardized regression coefficients for the analyses  
 146 of sensorimotor PSD features as a function of group, age, sex, cortical thickness and the interaction  
 147 between these factors. \* indicate factors with Bayes Factor > 3 in the model comparison.

148 **2.2 Burst features**

149 The view of sensorimotor oscillatory activity has recently changed from a steady oscillating signal to  
 150 viewing the activity in the sensorimotor bands occurring in short bursts. We compared features of the  
 151 sensorimotor rhythm in terms of time-domain analysis of spontaneous transient bursts in the time  
 152 series. Model comparison to test which predictors explained the variation in the burst features gave  
 153 evidence for an interaction effect between group and age on the burst rate (BF = 33.57) and a main  
 154 effect of sex on the burst rate (BF = 4.34). Model coefficients are displayed in Figure 4.

155 The age-related effects from the model amount to a change in burst rate of -0.7% [CI: -1.6:0.2] per year  
 156 for female PD patients and -1.7% [CI: -3.1:-0.3] change in burst rate per year for male PD patients,

157 whereas female controls had a relative increase in burst rate of 0.8% [CI: 0.1:1.7] per year and male  
 158 controls had a stable trend of -0.2% [CI: -1.0:0.6] change per year.

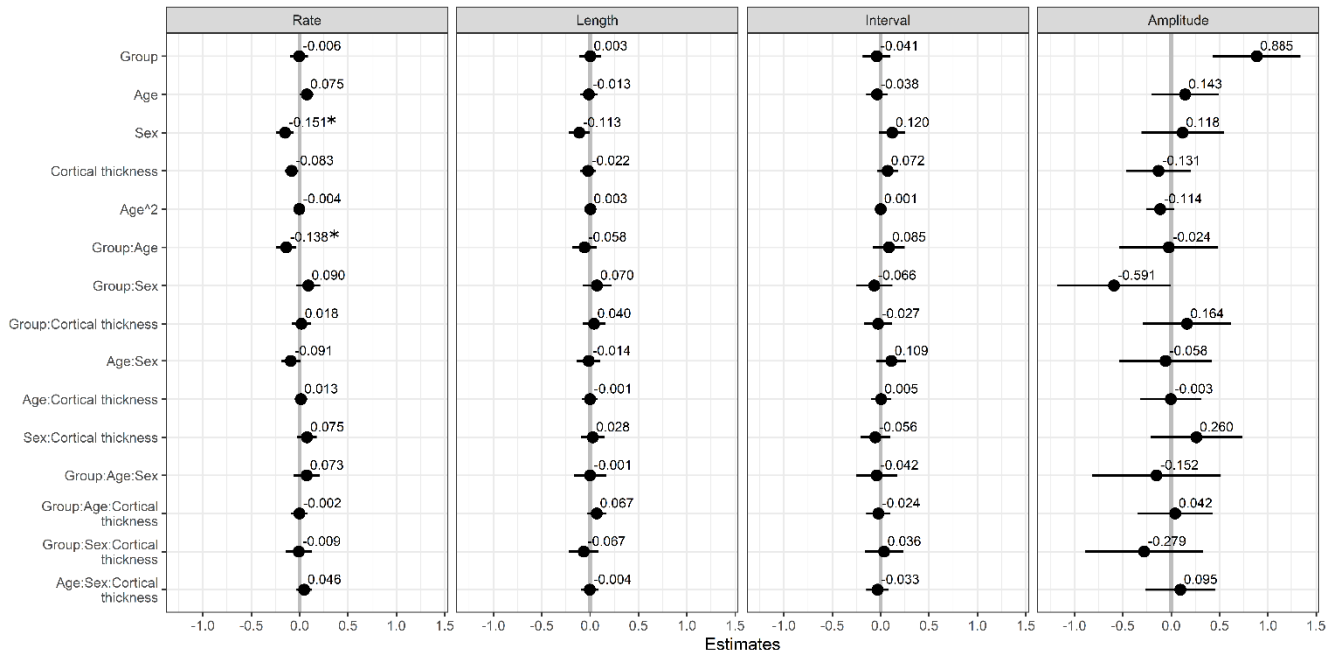

159

160 **Figure 4: Regression analysis of burst features.** Standardized regression coefficients for the analyses  
 161 of burst features as a function of group, age, sex, cortical thickness and the interaction between these  
 162 factors. \* indicate factors with Bayes Factor > 3 in the model comparison.

163 No other predictors showed evidence of an effect beyond the threshold for substantial evidence on  
 164 neither burst length, the interval between bursts, nor burst amplitude. There was anecdotal evidence  
 165 (i.e.  $1/3 < BF < 3$ ) for a group difference in burst amplitude ( $BF = 2.08$ ) as well as an interaction effect  
 166 of age and cortical thickness on the burst rate ( $BF = 1.43$ ), and an interaction between sex and cortical  
 167 thickness on the burst rate ( $BF = 1.86$ ).

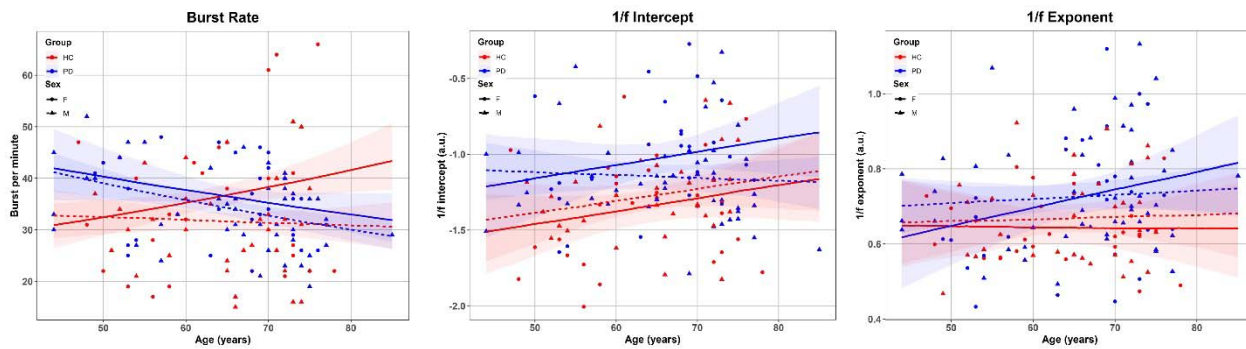

168

169 **Figure 5: Age-related differences in sensorimotor signal features.** Scatterplots of the individual  
170 measures and model predictions over age for (A) burst rate, (B) PSD broadband 1/f intercept, and (C)  
171 PSD broadband 1/f exponent, split between PD patients (blue) and healthy controls (red), and female  
172 (solid) and male (dashed).

### 173 2.3 Clinical symptoms and oscillatory features

174 In the second analysis, we tested for associations between motor symptoms and the features of the  
175 sensorimotor signal in the PD group. All sensorimotor signal features listed in Table 2 were used as  
176 predictors in a multiple regression analysis that further included age, sex, and cortical thickness to  
177 regress out the contribution hereof. The standardised regression coefficients of each predictor variable  
178 on the motor symptoms measured with MDS-UPDRS-III<sup>58</sup> are presented in Figure 6.

179 Model comparison of multiple regression models showed evidence that burst rate was negatively  
180 associated with upper limbs bradykinesia (BF = 12.70). The negative direction of the effect of burst  
181 rate means that reduced burst rate was associated with increased severity of bradykinesia. The analysis  
182 yielded no substantial evidence for effects of other sensorimotor signal features on symptom ratings for  
183 axial symptoms, rest tremor, rigidity, rest tremor, postural/kinetic tremor, nor lower limb bradykinesia.

184 The analysis yielded substantial evidence for an effect of age on axial symptoms (BF = 5.79) and  
 185 evidence for a difference between male and female patients on axial symptoms (BF = 7.56) and rest  
 186 tremor (BF = 6.06). There were anecdotal evidence for an effect of alpha centre frequency on upper  
 187 limbs bradykinesia (BF = 2.63), an effect of burst length on axial symptoms (BF = 1.49), as well as  
 188 anecdotal evidence for an effect of cortical thickness on upper limbs bradykinesia (BF = 2.63).

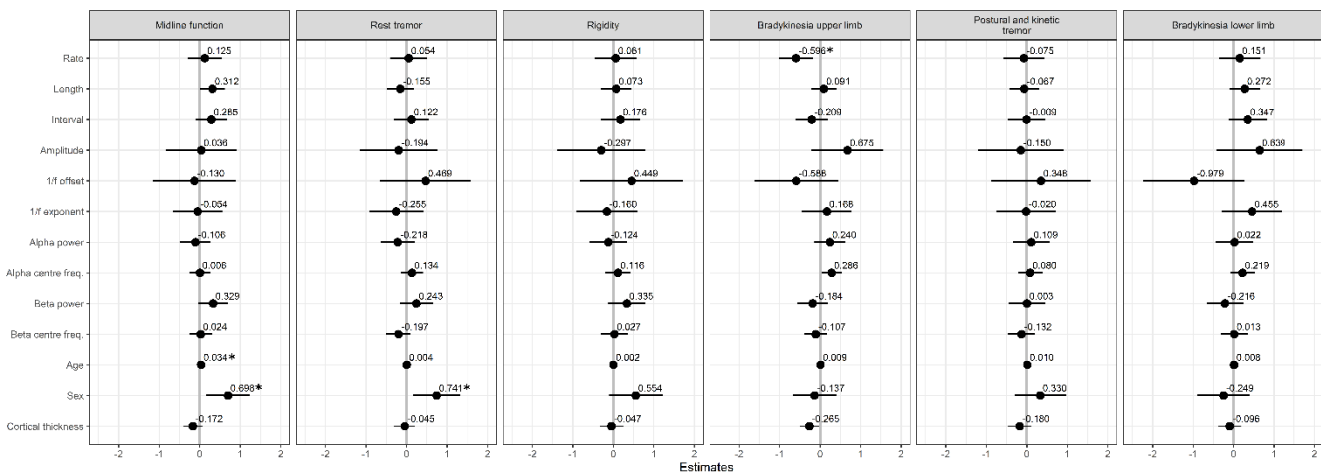

189

190 **Figure 6: Regression analysis of motor symptoms.** Standardized regression coefficients for the  
 191 regression analyses of sensorimotor signal features on clinical motor symptom ratings in PD. \* indicate  
 192 factors with Bayes Factor > 3 in the model comparison.

### 193 3 Discussion

194 This study aimed to explore how different features of cortical somatosensory oscillatory activity at rest  
 195 differed between PD patients and healthy controls across age and gender and how these features relate  
 196 to motor symptoms in PD. The analysis of spontaneous sensorimotor bursts showed an increased age-  
 197 related reduction in PD patients compared to healthy controls. Notably, our current results show that

198 the reduced burst rate in PD is not a static group-level difference but interacts with age with a steeper  
199 age-related reduction in burst rate in PD compared to healthy controls.

200 We hypothesised that different oscillatory features reflect distinct underlying functional neural  
201 properties and manifest as different motor symptoms in PD. The results showed that a reduction in mu-  
202 beta burst rate in PD was accompanied with an increase in bradykinesia severity, confirming previous  
203 findings from our group.<sup>14</sup> This relationship was exclusive for the bursts rate, as we observed no  
204 statistically evident relationships between other burst features or PSD features and clinical motor  
205 symptoms.

### 206 3.1 Characterizing neural time series data

207 The cortical sensorimotor activity of the PD patients differed from healthy controls, but did not differ  
208 on the PSD in the canonical sensorimotor mu and beta bands. The PD patients showed a steeper  
209 broadband 1/f slope and exponent of the broadband PSD than healthy controls. The observation of a  
210 group difference in the spectral broadband 1/f characteristics of the signal adds to the growing evidence  
211 that a focus on neural activity as narrow-band steady oscillations—e.g. narrowly focusing only on the  
212 beta-band power—could potentially miss essential aspects of the neural signals for understanding  
213 mechanistic changes in disease.<sup>59,60</sup> Widening the quantitative analysis of PSD rather than focusing  
214 exclusively on narrow band activity is of potential clinical value: quantifying only the peaks in the PSD  
215 to differentiate patients from controls can misrepresent the actual oscillatory response at those  
216 frequencies as the peaks are influenced by the broadband offset and 1/f exponent. Any unaccounted-for  
217 systematic differences in either PSD offset or decay exponent can lead to a false conclusion that there  
218 is a difference in the oscillatory response.<sup>51,52</sup> Non-invasive measurements of changes in sensorimotor  
219 activity is—despite the often conflicting findings<sup>48</sup>—a potential useful method to assess disease-related



220 changes. At the current stage of the field there is, however, a need to further bridge how features in the  
221 signals are linked to disease mechanisms.

222 Analysis of neural time series by frequency decomposition is a powerful tool to extract and summarise  
223 features of the signal, but the method comes with limitations in what one can infer. In the time domain,  
224 increased oscillatory power can reflect both increased burst duration and change in burst amplitude and  
225 as an expression of true sustained oscillations in the signal.<sup>36,61</sup> The presence of more sustained  
226 oscillations in the sensorimotor rhythm might reflect a higher level of inhibition of sensorimotor  
227 information; as is seen in recordings from STN<sup>5</sup> and, to some extent, also at the cortical level.<sup>38,62</sup>  
228 However, sustained oscillations are not in contrast to the bursting properties of the sensorimotor  
229 rhythm. The neural time-series can express both a degree of sustained oscillations while also exhibiting  
230 variation in the degree of transient bursts—e.g., a signal of steady oscillation with transient high-  
231 amplitude bursts.

### 232 3.2 Beta bursts and beta activity

233 Bursting properties of the cortical sensorimotor neural activity are proposed to occur due to long-range  
234 input through the ascending thalamic-cortical connection to the cortex, leading to an increase in the  
235 local neural excitation and resulting in a burst of synchronous activity.<sup>36</sup> The observed disease-related  
236 changes in spontaneous cortical bursts, in the form of a more rapid decrease in rate over age for PD  
237 patients, could reflect inhibition of these projections along the thalamic-cortical pathways caused by  
238 disturbances in the dopamine-dependent structures projecting to the cortex. Interestingly, we did not  
239 find significant group differences in burst duration in the current study—in line with previously  
240 reported findings on cortical burst in PD<sup>14</sup>—supporting the view that the central mechanisms of the  
241 cortical bursts are not primarily affected in PD—instead, it is the *rate* of bursts that is reduced at the

242 cortical level. The sub-cortical beta-band activity is influenced by the activity of dopamine-responding  
243 neurons<sup>5,6,45</sup>. The effect of dopamine and dopaminergic medication on the cortical beta-band is likely  
244 mediated by the dopaminergic neurons projecting to the cortex that terminates in the pre-frontal cortex  
245 but also to less extent in the primary sensorimotor cortex.<sup>63</sup> The differences in the cortical  
246 sensorimotor burst rate in PD might be an indirect effect of the loss of dopamine and changes in the  
247 beta band in the sub-cortical structures projecting to the sensorimotor cortex. The notion that the  
248 cortical sensorimotor activity is indirectly related to dopamine depletion in PD is further supported by  
249 findings from animals studies showing that 6-hydroxydopamine injections lead to exaggerated beta-  
250 band oscillations only after several days had passed, suggesting that oscillatory changes occurred as an  
251 indirect compensatory effect after dopamine depletion rather than a direct consequence of the depletion  
252 itself.<sup>7</sup> The indirect influence of dopamine on the cortical beta-band might also explain the often weak  
253 or even absent effect of dopaminergic medication on cortical beta-band activity.<sup>11,13-15</sup> The current  
254 study cannot directly address the role of dopamine on cortical oscillations since all patients in the study  
255 were tested on medication. However, a recent study found that cortical burst characteristics measured  
256 with MEG were influenced by DBS therapy in PD and normalised the bursting characteristics during  
257 DBS to resemble the burst characteristics of healthy controls.<sup>46</sup> This further supports that cortical  
258 bursting activity is mediated by subthalamic projections.

### 259 3.3 Age-related differences

260 We explored how age-related differences in cortical sensorimotor neural activity might interact with  
261 disease-related changes in PD. Age-related effects on spontaneous sensorimotor activity are commonly  
262 dealt with by matching the age distributions of the patient group and the healthy control group—  
263 usually within a narrow age span. The analysis showed age-related differences in burst rate, with PD

264 patients showing a more considerable reduction of burst as a function of age than healthy controls. The  
265 steeper reduction in burst rate with age in PD seems in accordance with the fact that higher age at PD  
266 onset is associated with a faster disease progression and more rapid decline in motor function<sup>64</sup>, though  
267 a longitudinal design is needed to confirm the relation between disease progression, reduction in burst  
268 rate, and age. We did not see a significant "slowing" of the beta PSD centre frequency between groups,  
269 as reported in several previous studies.<sup>48</sup> An explanation might be that such slowing is more  
270 pronounced in PD patients with dementia<sup>27-30</sup> and correlates with cognitive ability.<sup>26</sup> The PD patients in  
271 the current study did not differ in their cognitive ability from the healthy controls. Furthermore, we  
272 focused on the activity in the sensorimotor cortex, whereas the slowing of alpha and beta PSD is  
273 usually found in frontal areas and globally throughout the brain.<sup>25,28,31</sup> We included cortical thickness  
274 measures within the same ROI from which we extracted the functional time-series, as we hypothesised  
275 that age-related effects upon the functional measures might be mediated through the age-related  
276 structural changes in the cortex. However, despite the negative correlation between age and cortical  
277 thickness (see supplementary material), we did not find pervasive evidence that cortical thickness  
278 affected any of the functional measures.

### 279 3.4 Sex differences

280 We also included sex to explore if disease-related changes in sensorimotor oscillatory activity differed  
281 between males and females, as there are well-documented sex differences in the manifestation of  
282 PD.<sup>1,65</sup> Male sex is a risk factor for developing PD, with an average incidence ratio of approximately  
283 2:1 male-female ratio across all stages of the disease.<sup>66</sup> The disease onset is on average two years  
284 earlier in males than females and differs in the initial manifestation of symptoms, with women more  
285 likely to develop tremor specific symptoms and men more likely to develop rigidity.<sup>67</sup> We are not

286 aware of any previous studies that explicitly included sex as a factor in analysing neural oscillations in  
287 PD. The regression analysis of motor symptoms showed evidence for a difference in midline function  
288 and rest tremor between male and female patients. We did not, however, find widespread sex  
289 differences in the various features of the sensorimotor activity. The analysis of the sensorimotor signal  
290 features only showed evidence for differences between males and females in the burst rate. A possible  
291 factor behind the sex differences in PD is the contribution of sex hormones on the nigrostriatal pathway  
292 and linked to the deterioration of the dopaminergic system, where testosterone levels appear to enhance  
293 dopamine loss, while estrogen has been identified as a neuroprotective agent for PD. Estrogen has been  
294 demonstrated to influence incidence levels of PD while menopause-related variations in estrogen levels  
295 are linked to variations in PD symptom severity.<sup>68</sup> At the current stage, it is unclear if estrogen sex  
296 hormones influences oscillatory bursts in the sensorimotor cortex. These findings illustrate the need for  
297 further studies into sex-specific changes in neural function and how they manifest and relate to PD.

### 298 3.5 Limitations and conclusions

299 The present study quantified the neural time series from the sensorimotor cortex based on pre-defined  
300 summary measures of its PSD and burst properties. We included more PD patients and healthy controls  
301 than similar previously conducted functional studies—typically in the range of 5-30 participants.<sup>48</sup> A  
302 limitation of our study for understanding the extent of changes in oscillatory sensorimotor activity is  
303 the focus on different features within a narrow ROI, which ignores other types of measurements that  
304 are potentially relevant to understanding the development of PD and motor symptoms: for example, the  
305 long-range connectivity between the sensorimotor cortex and other cortical areas and the connections  
306 between the sensorimotor cortex and the basal ganglia and thalamus (though the subcortical structures  
307 are practically invisible in MEG).

308 Treating the activity in the sensorimotor cortex as single time series also means that we remove the  
309 sensitivity to spatial features of the signals, e.g., focal versus spatially blurred activity in one group or  
310 the other. If the oscillatory activity extends over a larger cortical surface area, that signal will also  
311 manifest as power differences in the measured signal.<sup>61</sup> There are potentially other features to be  
312 uncovered, and future studies may explore how the PSD- and burst features further interact with other  
313 aspects of brain activity in the global function of the brain to fully understand the interaction between  
314 functional and structural changes in PD.

315 We investigated a relatively large cohort of PD patients and healthy controls (for a neuroimaging  
316 study) to make meaningful inferences about how age and sex interact with the group level difference  
317 between PD patients and healthy controls; however, a limitation is that our study is cross-sectional. We  
318 aim to follow this cohort longitudinally to estimate the development trajectories of the sensorimotor  
319 oscillatory activity in PD compared to healthy ageing.

320 Sensorimotor activity measured non-invasively with MEG/EEG contains rich information about the  
321 functional state of the sensorimotor system and how it changes in PD. The central challenge is  
322 quantifying the measured neural signals to extract the disease's relevant features from the signals, be it  
323 the spectral power, centre frequencies, or burst-like features. Finding features of neural signals that can  
324 explain disease mechanism or symptoms, even if extracted along with a reduced number of dimensions,  
325 will be helpful if they provide adequate information about the disease- or symptom-state. Further  
326 characterisation of the association between features in the non-invasive brain signals and motor  
327 symptoms can potentially be a valuable tool to aid in diagnosis and treatment evaluation.

328 Understanding how features in the neural time series are related to motor symptoms in PD will also  
329 help develop non-invasive neural stimulation that can potentially relieve motor symptoms.<sup>37,69</sup>

## 330 4 Methods

### 331 4.1 Participants

332 Eighty PD patients (age 44-85; 32 female) and 71 healthy controls (age 46–78; 46 female) participated  
333 in the study. The study was approved by the regional ethics committee (Etikprövningsnämnden  
334 Stockholm, DNR 2019-00542) and followed the Declaration of Helsinki. All participants gave written  
335 informed consent before participation.

336 The PD patients were recruited from the Parkinson's Outpatient Clinic, Department of Neurology,  
337 Karolinska University Hospital, Stockholm, Sweden. The healthy controls were recruited by  
338 advertising or amongst spouses of PD patients. 22 participants (18 patients, 4 healthy controls) were  
339 included from a previous study<sup>14</sup> who were qualified based on the recruitment criteria of the present  
340 study and had done the same MEG and MRI procedures as in the present study. All data were  
341 reanalysed following the procedure described below.

342 The inclusion criteria for the PD group were a diagnosis of PD according to the United Kingdom  
343 Parkinson's Disease Society Brain Bank Diagnostic Criteria with Hoehn and Yahr stage 1-3.<sup>70</sup>  
344 Inclusion criteria for the control group were not having a diagnosis of PD, no form of movement  
345 disorder, and no history of neurological disorders, epilepsy, or psychiatric disorders.

346 Exclusion criteria for both groups were a diagnosis of major depression, dementia, history or presence  
347 of schizophrenia, bipolar disorder, epilepsy, or history of alcoholism or drug addiction according to the  
348 *Diagnostic and Statistical Manual of Mental Disorders*.<sup>71</sup>

349 One participant declined to do the MRI scanning, one participant had a scanner malfunction during  
350 MRI acquisition, and 11 participants had their MRI scans cancelled due to the Covid-19 pandemic and

351 were not included in the analysis. In total, two PD patients and 11 healthy controls were excluded from  
352 the analysis. Table 1 is a summary of the participants included in the analysis.

353 The PD patients participated in the study while on their regular prescribed dose of medication. The  
354 levodopa equivalent daily dose (LEDD) was calculated according to Tomlinson et al.<sup>72</sup> Motor  
355 symptoms in the PD group were assessed using the motor section of the Movement-Disorder Society  
356 Unified Parkinson's Disease Rating Scale (MDS-UPDRS-III).<sup>59</sup> Global cognition was assessed with the  
357 Montreal Cognitive Assessment battery (MoCA).<sup>74</sup>

## 358 4.2 MEG recordings

359 MEG data were recorded with a Neuromag TRIUX 306-channel MEG system, with 102  
360 magnetometers and 102 pairs of planar gradiometers. Data were sampled at 1000 Hz with an online 0.1  
361 Hz high-pass filter and 330 Hz low-pass filter. The MEG scanner was located inside a two-layer  
362 magnetically shielded room (Vacuumschmelze GmbH) with internal active shielding active to suppress  
363 electromagnetic artefacts. The subjects' head position and head movements inside the MEG scanner  
364 were measured during recordings with head-position indicator coils (HPI) attached to subjects' heads.  
365 The HPI location and additional points sampled uniformly across the subjects' head shape were  
366 digitalised with a Polhemus Fastrak motion tracker before the measurements. Horizontal and vertical  
367 electrooculogram (EOG) and electrocardiogram (ECG) were recorded simultaneously with the MEG.  
368 We recorded three minutes of resting-state MEG while the participants sat with their eyes closed. The  
369 participants were instructed to close their eyes and relax. The recordings began after assuring the  
370 participant sat still with their eyes closed.

### 371 4.3 MRI acquisition

372 3D T1-weighted magnetisation-prepared rapid gradient-echo (MPRAGE) sequence structural images  
373 (voxel size: 1x1x1 mm) were obtained on a GE Discovery 3.0 T MR scanner for morphological  
374 analysis and creating source spaces for MEG source reconstruction. Multi-echo "FLASH"<sup>75</sup> images  
375 were obtained to create volumetric headmodels for MEG source reconstruction (see below).

### 376 4.4 MRI processing

377 The MRI images were processed with Freesurfer<sup>76</sup> (v. 5.3) to get surface reconstructions of the cortical  
378 mantle. The surfaces were obtained with the automatic routine for extracting cortical surfaces in  
379 Freesurfer from the individual T1-weighted MRI.

380 We defined the cortical sensorimotor area by segmenting the cortical surface using the anatomical  
381 labels provided by Freesurfer automatic labelling.<sup>77</sup> The analysis focused on a region of interest (ROI)  
382 consisting of the left pre- and post-central gyri and central sulcus. The pre/postcentral gyri were  
383 combined because a biomagnetic source on either sulci wall will leave a trace on the other side due to  
384 the close distance and the field spread of MEG signals. The ROI was defined for each subject based on  
385 the individual cortical reconstructions. The average cortical thickness in the ROI was estimated with  
386 Freesurfer.<sup>78</sup>

### 387 4.5 MEG pre-processing

388 The MEG data was processed by applying temporal signal space separation (tSSS) to suppress artefacts  
389 from outside the scanner helmet and correct head movement during the recording.<sup>79</sup> The tSSS had a  
390 buffer length of 10 s and a cut-off correlation coefficient of 0.95. Movement correction was done by



391 shifting the head position to a position based on the median of the continuous head position during the  
392 three-minute recording.

393 The MEG data processing and source reconstruction was done with MNE-Python<sup>80</sup> in Python 3.8. First,  
394 we marked data segments containing muscle artefacts and SQUID jumps with the automatic artefact  
395 detection in MNE-Python. The data was filtered with a 48 Hz low-pass filter and 50 Hz notch filter to  
396 remove line noise. The continuous data were cut into 1.0 s epochs, and epochs with muscle artefacts or  
397 extreme values (5000 fT for magnetometers and 4000 fT/cm for gradiometers) were rejected. Between  
398 0-65 % (median: 6.0 %) of data was rejected resulting in 63.0-180 s (median: 174.0 s) of useful MEG  
399 data per participant. The remaining data length was not significantly different between groups  
400 (Wilcoxon rank sum test,  $p = 0.98$ ). We then performed an independent component analysis (ICA)  
401 using the *fastica* algorithm<sup>81</sup> to identify artefacts from blinks and heartbeats. Components showing  
402 correlation with the EOG and ECG were removed from the raw data. Between 0-5 (median 3)  
403 components were removed per participant. The number of removed ICA components was not  
404 significantly different between groups (Wilcoxon rank sum test,  $p = 0.71$ ).

405 We then applied source reconstruction using noise weighted minimum-norm estimates.<sup>82</sup> The noise  
406 covariance matrix was estimated from two minutes of empty room MEG data recorded before each  
407 session. The source space consisted of 5124 evenly spaced points sampled across the white matter  
408 surfaces. The inner skull boundary was estimated from the multi-echo MRI to create a single shell  
409 volume conductor model. The time series from the sensorimotor ROI (see Figure. 1) was extracted  
410 from the estimated source time series by singular value decomposition of all source points within the  
411 ROI.

## 412 4.6 Power spectral analysis

413 We analysed the spectral properties of the sensorimotor activity by calculating the PSD from 0.5 to 40  
414 Hz across the entire cleaned ROI time series using Welch's method by segmenting the continuous data  
415 into 3.072 s epochs with 50% overlap and averaging the PSD across the segments.

416 Since the narrow-band beta power in the PSD is dependent on the broader features of the broadband  
417 spectrum, we further analysed the 1/f broadband characteristic of the sensorimotor activity as this could  
418 play a role in the functional properties of the beta-band and has been shown to differ between healthy  
419 control and PD patients.<sup>14</sup> We used the *fitting oscillations & one over f* (FOOOF) toolbox<sup>51</sup> to analyse  
420 the 1/f broadband characteristic of the PSD (intercept and exponent) and the oscillatory peaks in the  
421 canonically defined beta band (13-30 Hz) and alpha band (8-12 Hz). A log-linear regression is fitted to  
422 the PSD and subtracted before fitting Gaussian functions to the peaks in the PSD. The midpoint of the  
423 Gaussian function fitted to a given frequency band corresponds to the peak frequency in that frequency  
424 band and the height represents the signal power. A new log-linear function is fitted to the PSD after  
425 subtracting the Gaussian function to estimate the 1/f characteristic.

426 All participants showed a discernible beta peak in the PSD. Nine PD patients and nine healthy controls  
427 did not show a peak in the PSD alpha band (no difference between groups,  $\chi^2(1) = 0.12$ ;  $p = 0.73$ ).

## 428 4.7 Burst analysis

429 To calculate the burst properties of the sensorimotor activity in the time domain, we band-pass filtered  
430 the time-series with an 8-30 Hz band-pass filter using FieldTrip<sup>83</sup> in MATLAB (R2016b; MathWorks  
431 Inc.) and calculated the Hilbert envelope of the signal. The burst threshold was defined as two times the  
432 median of the signal. The burst onset was defined as the time-point where the signal first reached half  
433 the max amplitude of the burst and ended at the time-point where the signal again dropped below half

434 the max amplitude of the burst. The *burst amplitude* was defined as the maximum value of the burst.  
435 The *burst duration* was defined as the time from burst onset to burst end. The *burst interval* was  
436 defined as the time from the end of a burst to the time-point where the next burst began.

## 437 4.8 Statistics

### 438 4.8.1 Analysis of sensorimotor rhythm features

439 The main analyses tested the effect of *group* (PD patients/healthy controls), *age*, *sex*, and *ROI cortical*  
440 *thickness* on the features listed in Table 2. For the PSD features, we modelled the outcomes as a linear  
441 function of group (PD patients/healthy controls), age, age squared, sex, and cortical thickness with  
442 linear regression in *R* (v. 4.0.2).<sup>84</sup> The regression models were fitted to the data for each participant  
443 with all factors and up to their three-way interactions between the four predictors. Gaussian regression  
444 models were estimated for each feature, except for the burst rate (burst per minute), which was  
445 modelled with Poisson regression using the same predictor variables. Before fitting the regression  
446 models, burst duration, burst interval, and burst amplitude were log-transformed.

447 Significance testing was done by removing one predictor from the model and comparing the variance  
448 explained between the full model and the model with a predictor removed. Hypothesis testing was done  
449 by computing the Bayes factor (BF) for the model with a given predictor (H1) versus the model  
450 without the predictor (H0) using the BIC approximation.<sup>85</sup> The BF tells how much more likely the  
451 observed data is under the alternative model (H1) versus the null model (H0). The Bayesian model  
452 comparison, therefore, avoids the multiple comparison problem of frequentist hypothesis testing  
453 (theoretical likelihood of the hypothesis given the observed data). The model comparison approach  
454 furthermore circumvents issues with the interpretation of p-values of individual regression coefficients  
455 due to internal correlation between predictor variables. Following the conventional interpretation of

456 BFs, we used  $BF > 3$  as a cut-off between anecdotal evidence and substantial effects.<sup>57</sup> The BFs for all  
457 comparisons are presented in Supplementary Table S3.

#### 458 4.8.2 Clinical scores and sensorimotor oscillatory features

459 The MDS-UPDRS-III scores were divided into subscales based on symptoms: *midline function, rest*  
460 *tremor, rigidity, upper-body bradykinesia, postural and kinetic tremor, and lower limb bradykinesia*;  
461 according to Goetz et al.<sup>86</sup>, with the exception that left- and right-side upper-body bradykinesia were  
462 combined into a single factor.

463 Each symptom score was analysed by multiple regression and modelled as a function of the burst rate,  
464 median burst duration, median bursts interval, median burst amplitude, PSD 1/f intercept, PSD 1/f  
465 exponent, PSD beta power, PSD beta centre frequency, PSD alpha power, and PSD alpha centre  
466 frequency for each PD patient. The models further included the age, sex, and cortical thickness to  
467 regress out the contribution hereof and estimate the relative effect size of each signal feature. All  
468 symptom ratings and continuous predictor variables, except age, were z-transformed to get the  
469 standardised effect size. Significance testing was done by removing one predictor from the model and  
470 calculating the BF between the full model (H1) and the model without the predictor (H0) using the BIC  
471 approximation for BFs. The BFs for all comparisons are presented in Supplementary Table S4.

#### 472 4.9 Data Availability

473 The full dataset cannot be made publicly available, as the ethical permits for the study does not allow  
474 for open data sharing. Parts of the data used in this analysis will be made available as part of an online  
475 data repository (Vinding, et al. *in prep*). The scripts used to process the data and run the analysis  
476 presented in the paper are available at: [https://github.com/natmegsweden/PD\\_beta\\_bursts2](https://github.com/natmegsweden/PD_beta_bursts2).

## 477 Authorship contribution statement

478 **Mikkel C. Vinding**: conceptualization, methodology, software, validation, formal analysis,  
479 investigation, data curation, writing - original draft, writing - review & editing, project administration.  
480 **Allison Eriksson**: investigation, resources, data curation, writing - review & editing, project  
481 administration. **Cassia Man Ting Low**: investigation, writing - review & editing. **Josefine**  
482 **Waldthaler**: investigation, writing - review & editing. **Daniel Ferreira**: supervision, writing - review  
483 & editing. **Martin Ingvar**: conceptualization, writing - review & editing, resources, funding  
484 acquisition. **Per Svenningsson**: conceptualization, methodology, resources, supervision, data curation,  
485 writing - review & editing, Project administration, Funding acquisition. **Daniel Lundqvist**:  
486 conceptualization, methodology, formal analysis, resources, supervision, writing - original draft,  
487 writing - review & editing, project administration, funding acquisition.

## 488 Declaration of competing Interest

489 The authors declare that they have no known competing financial interests or personal relationships  
490 that could have appeared to influence the work reported in this paper.

## 491 References

- 492 1. Kalia, L. V. & Lang, A. E. Parkinson's disease. *The Lancet* **386**, 896–912 (2015).
- 493 2. Rodriguez-Oroz, M. C. *et al.* Initial clinical manifestations of Parkinson's disease: features and  
494 pathophysiological mechanisms. *The Lancet Neurology* **8**, 1128–1139 (2009).
- 495 3. Braak, H. *et al.* Staging of brain pathology related to sporadic Parkinson's disease. *Neurobiology of*  
496 *aging* **24**, 197–211 (2003).
- 497 4. Jenkinson, N. & Brown, P. New insights into the relationship between dopamine, beta oscillations  
498 and motor function. *Trends in Neurosciences* **34**, 611–618 (2011).
- 499 5. Alonso-Frech, F. *et al.* Slow oscillatory activity and levodopa-induced dyskinesias in Parkinson's  
500 disease. *Brain* **129**, 1748–1757 (2006).
- 501 6. Giannicola, G. *et al.* The effects of levodopa and ongoing deep brain stimulation on subthalamic  
502 beta oscillations in Parkinson's disease. *Experimental Neurology* **226**, 120–127 (2010).
- 503 7. Mallet, N. *et al.* Disrupted Dopamine Transmission and the Emergence of Exaggerated Beta  
504 Oscillations in Subthalamic Nucleus and Cerebral Cortex. *Journal of Neuroscience* **28**, 4795–4806  
505 (2008).
- 506 8. Neumann, W.-J. *et al.* Long term correlation of subthalamic beta band activity with motor  
507 impairment in patients with Parkinson's disease. *Clinical Neurophysiology* **128**, 2286–2291 (2017).
- 508 9. Kühn, A. A., Kupsch, A., Schneider, G.-H. & Brown, P. Reduction in subthalamic 8-35 Hz  
509 oscillatory activity correlates with clinical improvement in Parkinson's disease: STN activity and  
510 motor improvement. *European Journal of Neuroscience* **23**, 1956–1960 (2006).

- 511 10. Martin, S. *et al.* Differential contributions of subthalamic beta rhythms and 1/f broadband activity  
512 to motor symptoms in Parkinson's disease. *npj Parkinson's Disease* **4**, 32 (2018).
- 513 11. Airaksinen, K. *et al.* Somatomotor mu rhythm amplitude correlates with rigidity during deep brain  
514 stimulation in Parkinsonian patients. *Clinical Neurophysiology* **123**, 2010–2017 (2012).
- 515 12. Feldmann, L. K. *et al.* Subthalamic beta band suppression reflects effective neuromodulation in  
516 chronic recordings. *European Journal of Neurology* ene.14801 (2021) doi:10.1111/ene.14801.
- 517 13. Hall, S. D. *et al.* GABA-mediated changes in inter-hemispheric beta frequency activity in early-  
518 stage Parkinson's disease. *Neuroscience* **281**, 68–76 (2014).
- 519 14. Vinding, M. C. *et al.* Reduction of spontaneous cortical beta bursts in Parkinson's disease is linked  
520 to symptom severity. *Brain Communications* (2020) doi:10.1093/braincomms/fcaa052.
- 521 15. Vinding, M. C. *et al.* Attenuated beta rebound to proprioceptive afferent feedback in Parkinson's  
522 disease. *Scientific Reports* **9**, (2019).
- 523 16. Cao, C. *et al.* L-dopa treatment increases oscillatory power in the motor cortex of Parkinson's  
524 disease patients. *NeuroImage: Clinical* **26**, 102255 (2020).
- 525 17. Heinrichs-Graham, E. *et al.* Hypersynchrony despite pathologically reduced beta oscillations in  
526 patients with Parkinson's disease: a pharmaco-magnetoencephalography study. *Journal of*  
527 *Neurophysiology* **112**, 1739–1747 (2014).
- 528 18. Melgari, J.-M. *et al.* Alpha and beta EEG power reflects L-dopa acute administration in  
529 parkinsonian patients. *Frontiers in Aging Neuroscience* **6**, 302 (2014).
- 530 19. Abbasi, O. *et al.* Unilateral deep brain stimulation suppresses alpha and beta oscillations in  
531 sensorimotor cortices. *NeuroImage* **174**, 201–207 (2018).

- 532 20. Luoma, J. *et al.* Spontaneous sensorimotor cortical activity is suppressed by deep brain stimulation  
533 in patients with advanced Parkinson's disease. *Neuroscience Letters* **683**, 48–53 (2018).
- 534 21. Cao, C.-Y. *et al.* Modulations on cortical oscillations by subthalamic deep brain stimulation in  
535 patients with Parkinson disease: A MEG study. *Neuroscience Letters* **636**, 95–100 (2017).
- 536 22. Pollok, B. *et al.* Motor-cortical oscillations in early stages of Parkinson's disease: Suppression of  
537 motor cortical beta oscillations is altered in early PD. *The Journal of Physiology* **590**, 3203–3212  
538 (2012).
- 539 23. Olde Dubbelink, K. T. E. *et al.* Resting-state functional connectivity as a marker of disease  
540 progression in Parkinson's disease: A longitudinal MEG study. *NeuroImage: Clinical* **2**, 612–619  
541 (2013).
- 542 24. Boon, L. I. *et al.* Motor effects of deep brain stimulation correlate with increased functional  
543 connectivity in Parkinson's disease: An MEG study. *NeuroImage: Clinical* **26**, 102225 (2020).
- 544 25. Stoffers, D. *et al.* Slowing of oscillatory brain activity is a stable characteristic of Parkinson's  
545 disease without dementia. *Brain* **130**, 1847–1860 (2007).
- 546 26. Vardy, A. N. *et al.* Slowing of M1 activity in Parkinson's disease during rest and movement – An  
547 MEG study. *Clinical Neurophysiology* **122**, 789–795 (2011).
- 548 27. Bosboom, J. L. W., Stoffers, D., Wolters, E. Ch., Stam, C. J. & Berendse, H. W. MEG resting state  
549 functional connectivity in Parkinson's disease related dementia. *Journal of Neural Transmission*  
550 **116**, 193–202 (2009).
- 551 28. Bosboom, J. L. W. *et al.* Resting state oscillatory brain dynamics in Parkinson's disease: An MEG  
552 study. *Clinical Neurophysiology* **117**, 2521–2531 (2006).



- 553 29. Olde Dubbelink, K. T. E. *et al.* Predicting dementia in Parkinson disease by combining  
554 neurophysiologic and cognitive markers. *Neurology* **82**, 263–270 (2014).
- 555 30. Ponsen, M. M., Stam, C. J., Bosboom, J. L. W., Berendse, H. W. & Hillebrand, A. A three  
556 dimensional anatomical view of oscillatory resting-state activity and functional connectivity in  
557 Parkinson’s disease related dementia: An MEG study using atlas-based beamforming.  
558 *NeuroImage: Clinical* **2**, 95–102 (2013).
- 559 31. Olde Dubbelink, K. T. E. *et al.* Cognitive decline in Parkinson’s disease is associated with slowing  
560 of resting-state brain activity: a longitudinal study. *Neurobiology of Aging* **34**, 408–418 (2013).
- 561 32. Stoffers, D., Bosboom, J. L. W., Wolters, E. Ch., Stam, C. J. & Berendse, H. W. Dopaminergic  
562 modulation of cortico-cortical functional connectivity in Parkinson’s disease: An MEG study.  
563 *Experimental Neurology* **213**, 191–195 (2008).
- 564 33. Karekal, A., Miocinovic, S. & Swann, N. C. Novel approaches for quantifying beta synchrony in  
565 Parkinson’s disease. *Exp Brain Res* **240**, 991–1004 (2022).
- 566 34. Feingold, J., Gibson, D. J., DePasquale, B. & Graybiel, A. M. Bursts of beta oscillation  
567 differentiate postperformance activity in the striatum and motor cortex of monkeys performing  
568 movement tasks. *Proc. Natl. Acad. Sci. U.S.A.* **112**, 13687–13692 (2015).
- 569 35. Leventhal, D. K. *et al.* Basal Ganglia Beta Oscillations Accompany Cue Utilization. *Neuron* **73**,  
570 523–536 (2012).
- 571 36. Sherman, M. A. *et al.* Neural mechanisms of transient neocortical beta rhythms: Converging  
572 evidence from humans, computational modeling, monkeys, and mice. *Proceedings of the National*  
573 *Academy of Sciences* **113**, E4885–E4894 (2016).

- 574 37. Tinkhauser, G. *et al.* The modulatory effect of adaptive deep brain stimulation on beta bursts in  
575 Parkinson's disease. *Brain* **140**, 1053–1067 (2017).
- 576 38. Shin, H., Law, R., Tsutsui, S., Moore, C. I. & Jones, S. R. The rate of transient beta frequency  
577 events predicts behavior across tasks and species. *eLife* **6**, (2017).
- 578 39. Duchet, B. *et al.* Average beta burst duration profiles provide a signature of dynamical changes  
579 between the ON and OFF medication states in Parkinson's disease.  
580 <http://biorxiv.org/lookup/doi/10.1101/2020.04.27.064246> (2020) doi:10.1101/2020.04.27.064246.
- 581 40. Khawaldeh, S. *et al.* Subthalamic nucleus activity dynamics and limb movement prediction in  
582 Parkinson's disease. *Brain* **143**, 582–596 (2020).
- 583 41. Lofredi, R. *et al.* Beta bursts during continuous movements accompany the velocity decrement in  
584 Parkinson's disease patients. *Neurobiology of Disease* (2019) doi:10.1016/j.nbd.2019.03.013.
- 585 42. Little, S., Bonaiuto, J., Barnes, G. & Bestmann, S. Human motor cortical beta bursts relate to  
586 movement planning and response errors. *PLoS Biol* **17**, e3000479 (2019).
- 587 43. Brady, B., Power, L. & Bardouille, T. Age-related trends in neuromagnetic transient beta burst  
588 characteristics during a sensorimotor task and rest in the Cam-CAN open-access dataset.  
589 *NeuroImage* **222**, 117245 (2020).
- 590 44. Tinkhauser, G. *et al.* Beta burst coupling across the motor circuit in Parkinson's disease.  
591 *Neurobiology of Disease* **117**, 217–225 (2018).
- 592 45. Tinkhauser, G. *et al.* Beta burst dynamics in Parkinson's disease OFF and ON dopaminergic  
593 medication. *Brain* **140**, 2968–2981 (2017).

- 594 46. Pauls, K. A. M. *et al.* Cortical beta burst dynamics are altered in Parkinson's disease but  
595 normalized by deep brain stimulation. *NeuroImage* 119308 (2022)  
596 doi:10.1016/j.neuroimage.2022.119308.
- 597 47. Power, L. & Bardouille, T. Age-related trends in the cortical sources of transient beta bursts  
598 during a sensorimotor task and rest. *NeuroImage* **245**, 118670 (2021).
- 599 48. Boon, L. I. *et al.* A systematic review of MEG-based studies in Parkinson's disease: The motor  
600 system and beyond. *Hum Brain Mapp* **40**, 2827–2848 (2019).
- 601 49. Salmelin, R., Hämäläinen, M., Kajola, M. & Hari, R. Functional Segregation of Movement-Related  
602 Rhythmic Activity in the Human Brain. *NeuroImage* **2**, 237–243 (1995).
- 603 50. Salmelin, R. & Hari, R. Spatiotemporal characteristics of sensorimotor neuromagnetic rhythms  
604 related to thumb movement. *Neuroscience* **60**, 537–550 (1994).
- 605 51. Donoghue, T. *et al.* Parameterizing neural power spectra into periodic and aperiodic components.  
606 *Nat Neurosci* **23**, 1655–1665 (2020).
- 607 52. He, B. J., Zempel, J. M., Snyder, A. Z. & Raichle, M. E. The Temporal Structures and Functional  
608 Significance of Scale-free Brain Activity. *Neuron* **66**, 353–369 (2010).
- 609 53. Bardouille, T., Bailey, L. & CamCAN Group. Evidence for age-related changes in sensorimotor  
610 neuromagnetic responses during cued button pressing in a large open-access dataset. *NeuroImage*  
611 **193**, 25–34 (2019).
- 612 54. Wolpe, N. *et al.* Ageing increases reliance on sensorimotor prediction through structural and  
613 functional differences in frontostriatal circuits. *Nature Communications* **7**, (2016).

- 614 55. Yau, Y. *et al.* Network connectivity determines cortical thinning in early Parkinson's disease  
615 progression. *Nat Commun* **9**, 12 (2018).
- 616 56. Lyoo, C. H., Ryu, Y. H. & Lee, M. S. Cerebral cortical areas in which thickness correlates with  
617 severity of motor deficits of Parkinson's disease. *J Neurol* **258**, 1871–1876 (2011).
- 618 57. Wetzels, R. *et al.* Statistical Evidence in Experimental Psychology An Empirical Comparison  
619 Using 855 t Tests. *Perspectives on Psychological Science* **6**, 291–298 (2011).
- 620 58. Goetz, C. G. *et al.* Movement Disorder Society-sponsored revision of the Unified Parkinson's  
621 Disease Rating Scale (MDS-UPDRS): Process, format, and clinimetric testing plan. *Movement*  
622 *Disorders* **22**, 41–47 (2007).
- 623 59. Robertson, M. M. *et al.* EEG power spectral slope differs by ADHD status and stimulant  
624 medication exposure in early childhood. *Journal of Neurophysiology* **122**, 2427–2437 (2019).
- 625 60. Gao, R., Peterson, E. J. & Voytek, B. Inferring synaptic excitation/inhibition balance from field  
626 potentials. *NeuroImage* **158**, 70–78 (2017).
- 627 61. Zich, C., Quinn, A. J., Mardell, L. C., Ward, N. S. & Bestmann, S. Dissecting Transient Burst  
628 Events. *Trends in Cognitive Sciences* S136466132030173X (2020) doi:10.1016/j.tics.2020.07.004.
- 629 62. Muralidharan, V. & Aron, A. R. Behavioral Induction of a High Beta State in Sensorimotor Cortex  
630 Leads to Movement Slowing. *Journal of Cognitive Neuroscience* 1–18 (2021)  
631 doi:10.1162/jocn\_a\_01717.
- 632 63. Luft, A. R. & Schwarz, S. Dopaminergic signals in primary motor cortex. *Int. j. dev. neurosci.* **27**,  
633 415–421 (2009).

- 634 64. De Pablo-Fernández, E., Lees, A. J., Holton, J. L. & Warner, T. T. Prognosis and Neuropathologic  
635 Correlation of Clinical Subtypes of Parkinson Disease. *JAMA Neurol* **76**, 470 (2019).
- 636 65. Göttgens, I. *et al.* The Impact of Sex and Gender on the Multidisciplinary Management of Care for  
637 Persons With Parkinson’s Disease. *Frontiers in Neurology* **11**, (2020).
- 638 66. Elbaz, A. *et al.* Risk tables for parkinsonism and Parkinson’s disease. *Journal of Clinical*  
639 *Epidemiology* **55**, 25–31 (2002).
- 640 67. Georgiev, D., Hamberg, K., Hariz, M., Forsgren, L. & Hariz, G.-M. Gender differences in  
641 Parkinson’s disease: A clinical perspective. *Acta Neurol Scand* **136**, 570–584 (2017).
- 642 68. Gillies, G. E., Pienaar, I. S., Vohra, S. & Qamhawi, Z. Sex differences in Parkinson’s disease.  
643 *Frontiers in Neuroendocrinology* **35**, 370–384 (2014).
- 644 69. Cook, A. J., Pfeifer, K. J. & Tass, P. A. A Single Case Feasibility Study of Sensorimotor Rhythm  
645 Neurofeedback in Parkinson’s Disease. *Front. Neurosci.* **15**, 623317 (2021).
- 646 70. Hoehn, M. M. & Yahr, M. D. Parkinsonism: onset, progression, and mortality. *Neurology* **17**, 427–  
647 427 (1967).
- 648 71. American Psychiatric Association. *Diagnostic and Statistical Manual of Mental Disorders*.  
649 (American Psychiatric Publishing, 2013).
- 650 72. Tomlinson, C. L. *et al.* Systematic review of levodopa dose equivalency reporting in Parkinson’s  
651 disease. *Movement Disorders* (2010) doi:10.1002/mds.23429.
- 652 73. Goetz, C. G. *et al.* Movement disorder society-sponsored revision of the unified Parkinson’s  
653 disease rating scale (MDS-UPDRS): Process, format, and clinimetric testing plan. *Movement*  
654 *Disorders* (2007) doi:10.1002/mds.21198.

- 655 74. Nasreddine, Z. S. *et al.* The Montreal Cognitive Assessment, MoCA: a brief screening tool for mild  
656 cognitive impairment. *Journal of the American Geriatrics Society* **53**, 695–699 (2005).
- 657 75. Fischl, B. *et al.* Sequence-independent segmentation of magnetic resonance images. *NeuroImage*  
658 **23**, S69–S84 (2004).
- 659 76. Dale, A. M., Fischl, B. & Sereno, M. I. Cortical Surface-Based Analysis: I. segmentation and  
660 surface reconstruction. *NeuroImage* **9**, 179–194 (1999).
- 661 77. Destrieux, C., Fischl, B., Dale, A. & Halgren, E. Automatic parcellation of human cortical gyri and  
662 sulci using standard anatomical nomenclature. *NeuroImage* **53**, 1–15 (2010).
- 663 78. Fischl, B. & Dale, A. M. Measuring the thickness of the human cerebral cortex from magnetic  
664 resonance images. *Proceedings of the National Academy of Sciences* **97**, 11050–11055 (2000).
- 665 79. Taulu, S. & Simola, J. Spatiotemporal signal space separation method for rejecting nearby  
666 interference in MEG measurements. *Physics in Medicine and Biology* **51**, 1759–1768 (2006).
- 667 80. Gramfort, A. *et al.* MEG and EEG data analysis with MNE-Python. *Frontiers in Neuroscience* **7**,  
668 267 (2013).
- 669 81. Hyvarinen, A. Fast and robust fixed-point algorithms for independent component analysis. *IEEE*  
670 *Transactions on Neural Networks* **10**, 626–634 (1999).
- 671 82. Dale, A. M. *et al.* Dynamic Statistical Parametric Mapping: Combining fMRI and MEG for High-  
672 Resolution Imaging of Cortical Activity. *Neuron* **26**, 55–67 (2000).
- 673 83. Oostenveld, R., Fries, P., Maris, E. & Schoffelen, J.-M. FieldTrip: Open Source Software for  
674 Advanced Analysis of MEG, EEG, and Invasive Electrophysiological Data. *Computational*  
675 *Intelligence and Neuroscience* **2011**, 1–9 (2011).

- 676 84. R Core Team. *R: A Language and Environment for Statistical Computing*. (R Foundation for  
677 Statistical Computing, 2020).
- 678 85. Wagenmakers, E.-J. A practical solution to the pervasive problems of p values. *Psychonomic*  
679 *Bulletin & Review* **14**, 779–804 (2007).
- 680 86. Goetz, C. G. *et al.* Movement Disorder Society-sponsored revision of the Unified Parkinson’s  
681 Disease Rating Scale (MDS-UPDRS): Scale presentation and clinimetric testing results. *Movement*  
682 *Disorders* **23**, 2129–2170 (2008).
- 683

## 1 Figure legends

### 2 Figure 1: Overview of the data processing pipeline.

3 Three minutes raw resting-state MEG data was obtained from each participant. The signals were  
4 projected through a minimum-norm source reconstruction to extract the activity in the sensorimotor  
5 cortex. We did a frequency decomposition of the source reconstructed signal to calculate the PSD to  
6 which a 1/f and Gaussian curve were fitted to extract the PSD features (Table 2). In addition, we  
7 quantified sensorimotor bursts in the signal time series in the sensorimotor ROI by thresholding the  
8 envelope of the band-pass filtered (8-30 Hz) signal to the mu-beta frequency range.

### 9 Figure 2: Group-level PSD.

10 Grand average PSD (mean+standard error) for the PD group (blue) and healthy control group (red).

### 11 Figure 3: Regression analysis of PSD features.

12 Standardized regression coefficients for the analyses of sensorimotor PSD features as a function of  
13 group, age, sex, cortical thickness and the interaction between these factors. \* indicate factors with  
14 Bayes Factor > 3 in the model comparison.

### 15 Figure 4: Regression analysis of burst features.

16 Standardized regression coefficients for the analyses of burst features as a function of group, age, sex,  
17 cortical thickness and the interaction between these factors. \* indicate factors with Bayes Factor > 3 in  
18 the model comparison.



19 **Figure 5: Age-related changes in sensorimotor signal features.**

20 Scatterplots of the individual measures and model predictions over age for (A) burst rate, (B) PSD  
21 broadband 1/f intercept, and (C) PSD broadband 1/f exponent, split between PD patients (blue) and  
22 healthy controls (red), and female (solid) and male (dashed).

23 **Figure 6: Regression analysis of motor symptoms.**

24 Standardized regression coefficients for the regression analyses of sensorimotor signal features on  
25 clinical motor symptom ratings in PD. \* indicate factors with Bayes Factor > 3 in the model  
26 comparison.

27 **Tables**

28 **Table 1**

29 Group-level summary of the participants included in the analysis. Mean (standard deviation).

| Measure                  | Parkinson's patients | Healthy controls | Statistics                        |
|--------------------------|----------------------|------------------|-----------------------------------|
| <i>N</i>                 | 78                   | 60               |                                   |
| <i>Sex (female/male)</i> | 29/49                | 27/33            | $\chi^2 = 0.57, p = 0.45$         |
| <i>Age</i>               | 65.6 (9.5)           | 63.93 (8.4)      | Welsh $t(138.0) = 1.08, p = 0.28$ |
| <i>Disease duration</i>  | 4.4 (3.7) years      | -                | -                                 |
| <i>LEDD</i>              | 548 (273) mg         | -                | -                                 |
| <i>MDS-UPDRS-III</i>     | 18.9 (10.8)          | -                | -                                 |
| <i>MoCA</i>              | 26.1 (2.8)           | 26.2 (2.1)       | Welsh $t(136) = 0.10, p = 0.92$   |

30

31 **Table 2**

32 Summary explanations of the main outcome variables in the analysis

| <b>Variable category</b> | <b>Variable</b>                    | <b>Explanation</b>                                                                                                                                                               |
|--------------------------|------------------------------------|----------------------------------------------------------------------------------------------------------------------------------------------------------------------------------|
| <b>PSD</b>               | <i>Beta power</i>                  | The maximum peak in the 13-30 Hz band. Estimated as the height of the Gaussian function fitted to the PSD after regressing out the 1/f spectrum.                                 |
|                          | <i>Beta centre frequency (Hz)</i>  | The dominant frequency bin in the 13-30 Hz band. Estimated as the centre of the Gaussian function fitted to the 13-30 Hz range of the PSD after regressing out the 1/f spectrum. |
|                          | <i>Alpha power</i>                 | The maximum peak in the 8-12 Hz band. Estimated as the height of the Gaussian function fitted to the PSD after regressing out the 1/f spectrum.                                  |
|                          | <i>Alpha centre frequency (Hz)</i> | The dominant frequency bin in the 8-12 Hz band. Estimated as the centre of the Gaussian function fitted to the 8-12 Hz range of the PSD after regressing out the 1/f spectrum.   |
|                          | <i>1/f offset</i>                  | The intercept of the log-linear regression line estimated from the full PSD in the 0.5-40 Hz range.                                                                              |
|                          | <i>1/f exponent</i>                | The decay exponent ( $1/f^k$ ) of the PSD, corresponding to the slope of the log-linear regression line, estimated from the full PSD in the 0.5-40 Hz range.                     |
| <b>Burst</b>             | <i>Rate</i>                        | The number of burst events in the time series divided by the length of the time series                                                                                           |
|                          | <i>Duration (ms)</i>               | The time point from where the signal envelope rise above the threshold until the next time point it drops below the threshold.                                                   |
|                          | <i>Interval (ms)</i>               | The time point from where the signal envelope drops below the threshold until the next time point it rises above the threshold.                                                  |
|                          | <i>Amplitude</i>                   | The maximum envelope amplitude within a burst event.                                                                                                                             |

33
